# Supplementary material
Source: PubMed Central journal article supplement (PMC4640635)
Supplement: 1500175_SM.pdf [file 1500175_SM.pdf]

## Supplementary Materials for

### **The matrikine N- $\alpha$ -PGP couples extracellular matrix fragmentation to endothelial permeability**

Cornelia S. Hahn, David W. Scott, Xin Xu, Mojtaba Abdul Roda, Gregory A. Payne, J. Michael Wells, Liliana Viera, Colleen J. Winstead, Preston Bratcher, Rolf W. Sparidans, Frank A. Redegeld, Patricia L. Jackson, Gert Folkerts, J. Edwin Blalock, Rakesh P. Patel, Amit Gaggar

Published 24 April 2015, *Sci. Adv.* **1**, e1500175 (2015)  
DOI: 10.1126/sciadv.1500175

#### **This PDF file includes:**

- Fig. S1. Multiple endothelial cells demonstrate ERK phosphorylation with IL-8 stimulation.
- Fig. S2. PGG stimulation does not activate HUVECs.
- Fig. S3. Blockade of ERK mitigates N- $\alpha$ -PGP-mediated VE-cadherin activation in endothelial cells.
- Fig. S4. Effects of N- $\alpha$ -PGP on PMVEC permeability.
- Fig. S5. N- $\alpha$ -PGP does not induce proinflammatory signaling in endothelial cells.

## SUPPLEMENTAL MATERIALS

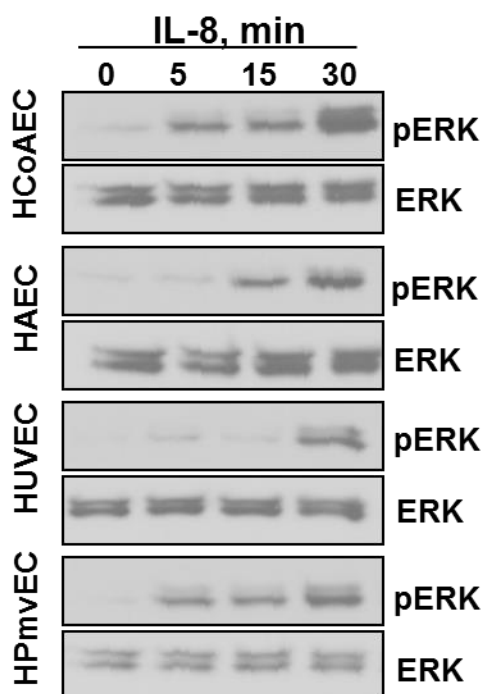

**Fig. S1. Multiple endothelial cells demonstrate ERK phosphorylation with IL-8 stimulation.**

HUVEC, pulmonary microvascular (HPmVEC), coronary artery (HCoAEC), and aortic (HAEC) endothelial cells were grown to confluence, serum starved for two hours, and then stimulated with 100 ng/ml IL-8 for 0-30 min. pERK was assessed by western blot analysis. Representative results from three independent experiments are shown.

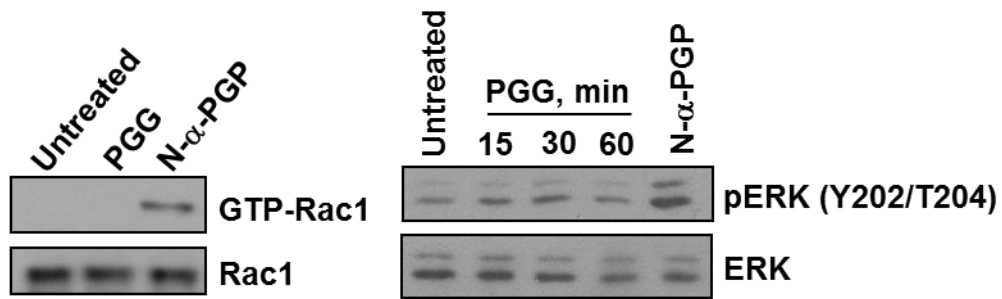

**Fig. S2. PGG stimulation does not activate HUVECs.** HUVECs were serum starved for two hours before stimulation with 0.5 mg/ml PGG for 0-60 min or with 0.5 mg/ml N- $\alpha$ -PGP for 60 min and activation of Rac1(GTP-Rac1) (**A**) and phosphorylation of ERK (**B**) were determined by Western blot.

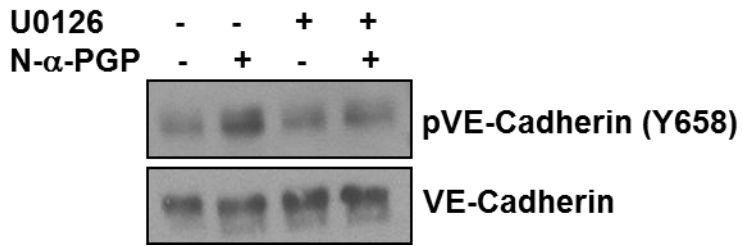

**Fig. S3. Blockade of ERK mitigates N- $\alpha$ -PGP-mediated VE-cadherin activation in endothelial cells.** HUVECs were untreated or treated with 0.5 mg/ml N- $\alpha$ -PGP alone or after pretreatment with 10  $\mu$ M U0126 and phosphorylation of VE-Cadherin were determined by Western blot.

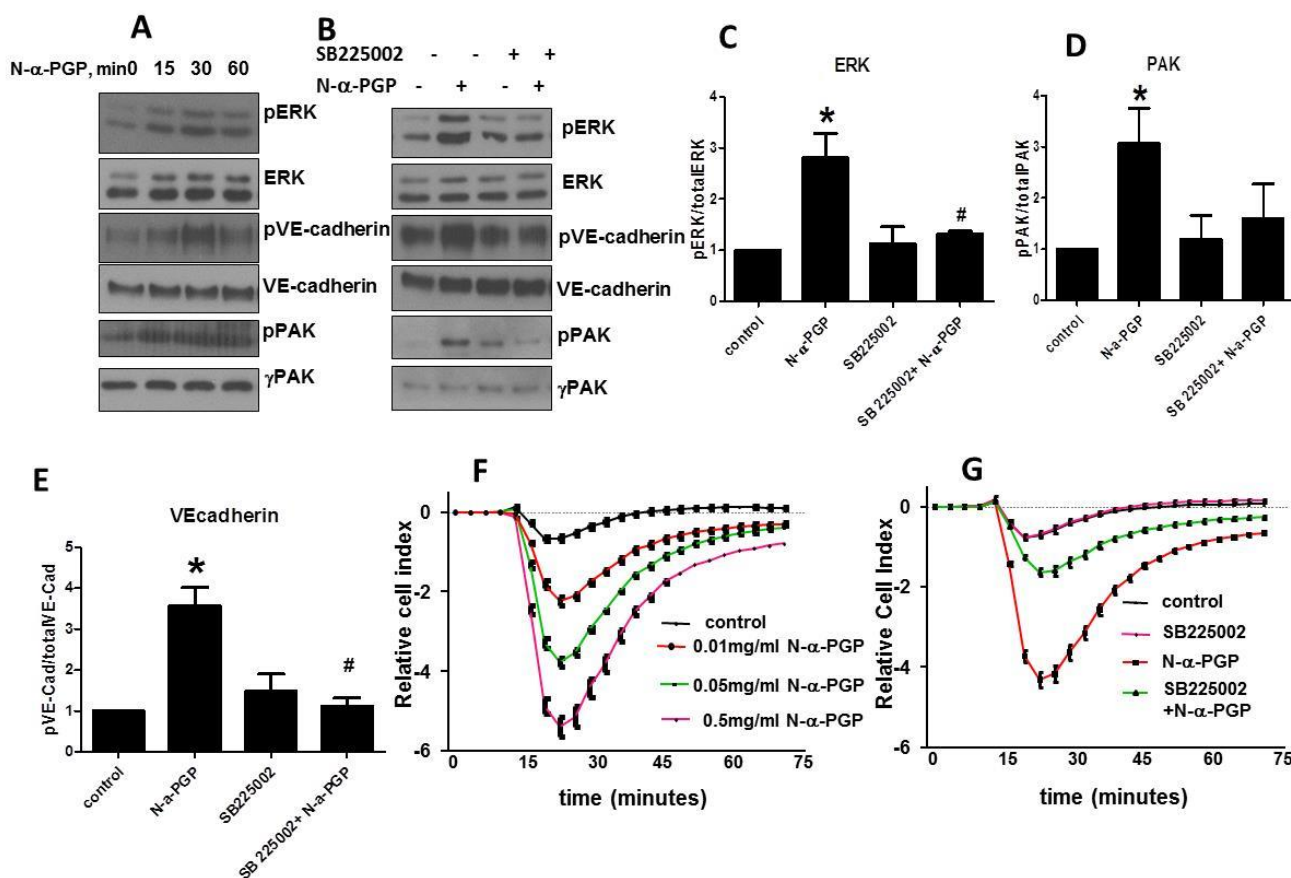

**Fig S4: Effects of N- $\alpha$ -PGP on PMVEC permeability.** (A) PMVECs were serum starved for two hours before stimulation with 0.05mg/ml N- $\alpha$ -PGP and time-dependent activation of ERK, VE-cadherin and PAK determined. (B-E) N- $\alpha$ -PGP-dependent activation of ERK, VE-cadherin and PAK was determined at 15min in the presence or absence of SB225002. Shown are representative Western blots together with quantification. Bar graphs show mean  $\pm$  SEM, n = 3 \*P<0.05 relative to time 0 by 1-way ANOVA with Tukey post-test. Shown are representative Western blots together with quantification. Bar graphs show mean  $\pm$  SEM, n = 3 \*P<0.05 relative to control, #P<0.05 relative to N- $\alpha$ -PGP by 1-way ANOVA with Tukey post-test. Changes in permeability in response to different doses of N- $\alpha$ -PGP peptide (F) and in the presence or absence of SB225002 (G). Graphs present mean  $\pm$  SEM from representative experiments.

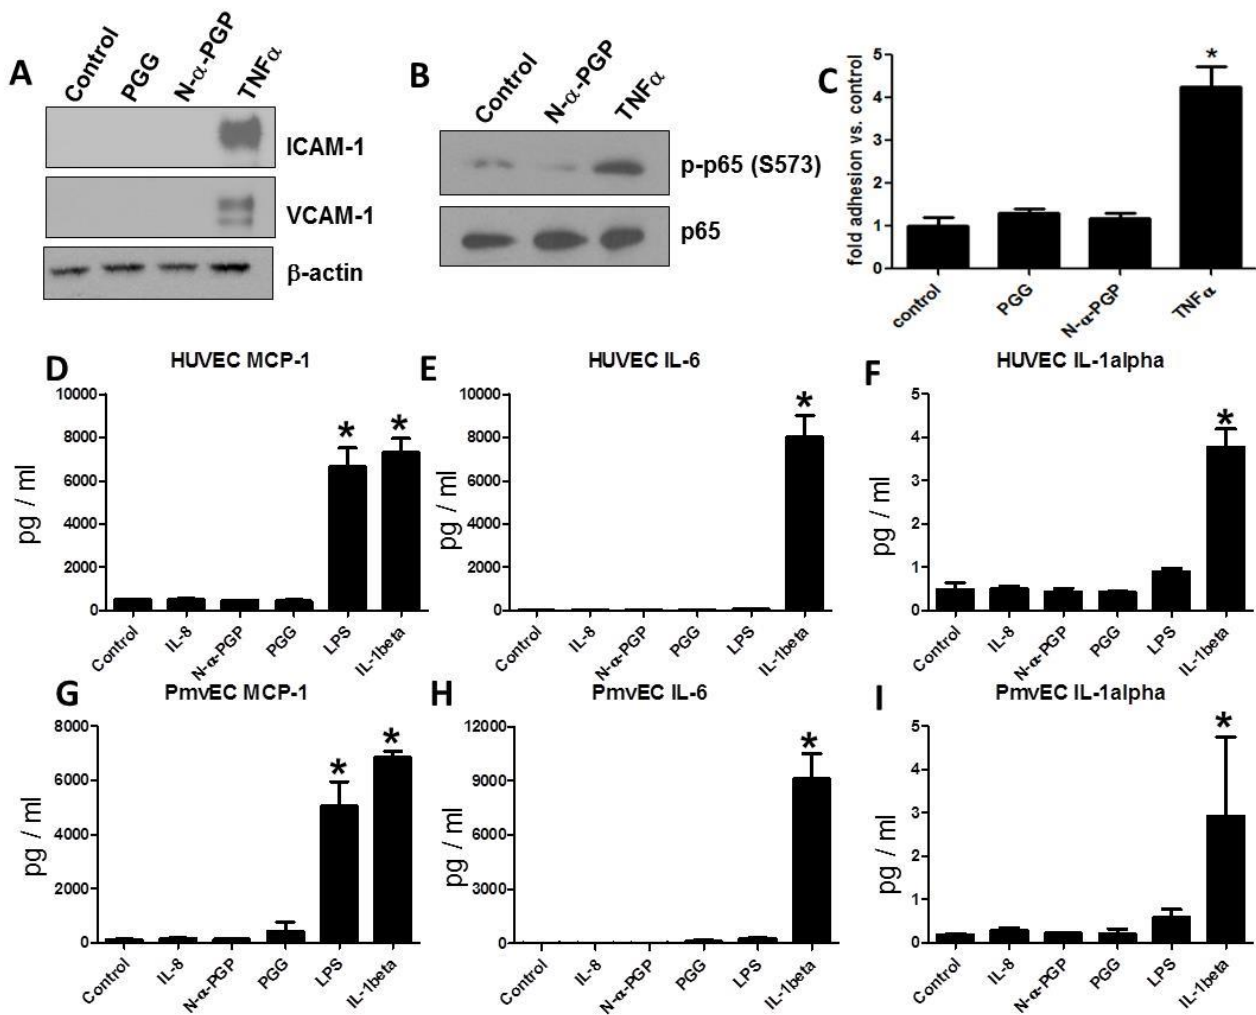

**Fig. S5. N- $\alpha$ -PGP does not induce proinflammatory signaling in endothelial cells.** HUVEC were untreated or treated with 0.5 mg/ml N- $\alpha$ -PGP, 0.5 mg/ml PGG control peptide, or 10 ng/ml TNF $\alpha$  for six hours. Lysates were collected and Western blot analysis was conducted for ICAM-1, VCAM-1 and  $\beta$ -actin (A) and for phosphorylation of p65 (B). Cells were treated as described above and their ability to support THP-1 monocyte adhesion was determined (C). Blots are representative of three separate experiments and THP-1 adhesion is representative of two separate experiments with 4-6 replicates per condition in each experiment. HUVEC (D-F) or PMVEC (G-I) were treated with IL8 (100ng/ml), N- $\alpha$ -PGP (0.05mg/ml), PGG (0.1mg/ml), LPS (100ng/ml) or IL1 $\beta$  (1ng/ml) for 12h and indicated cytokines measured. Data shown mean  $\pm$  SEM (n=3), \*P<0.05 relative to control by 1-way ANOVA with Tukey post-test.
